# Supplementary material
Source: PubMed Central journal article supplement (PMC3110672)
Supplement: NIHMS296226-supplement-02.pdf [file NIHMS296226-supplement-02.pdf]

association of group 1 metabotropic glutamate receptors with multivalent complexes of homer-related, synaptic proteins. *Neuron* 21, 707-716.

Yuan, J.P., Kiselyov, K., Shin, D.M., Chen, J., Shcheynikov, N., Kang, S.H., Dehoff, M.H., Schwarz, M.K., Seeburg, P.H., Muallem, S., *et al.* (2003). Homer binds TRPC family channels and is required for gating of TRPC1 by IP3 receptors. *Cell* 114, 777-789.

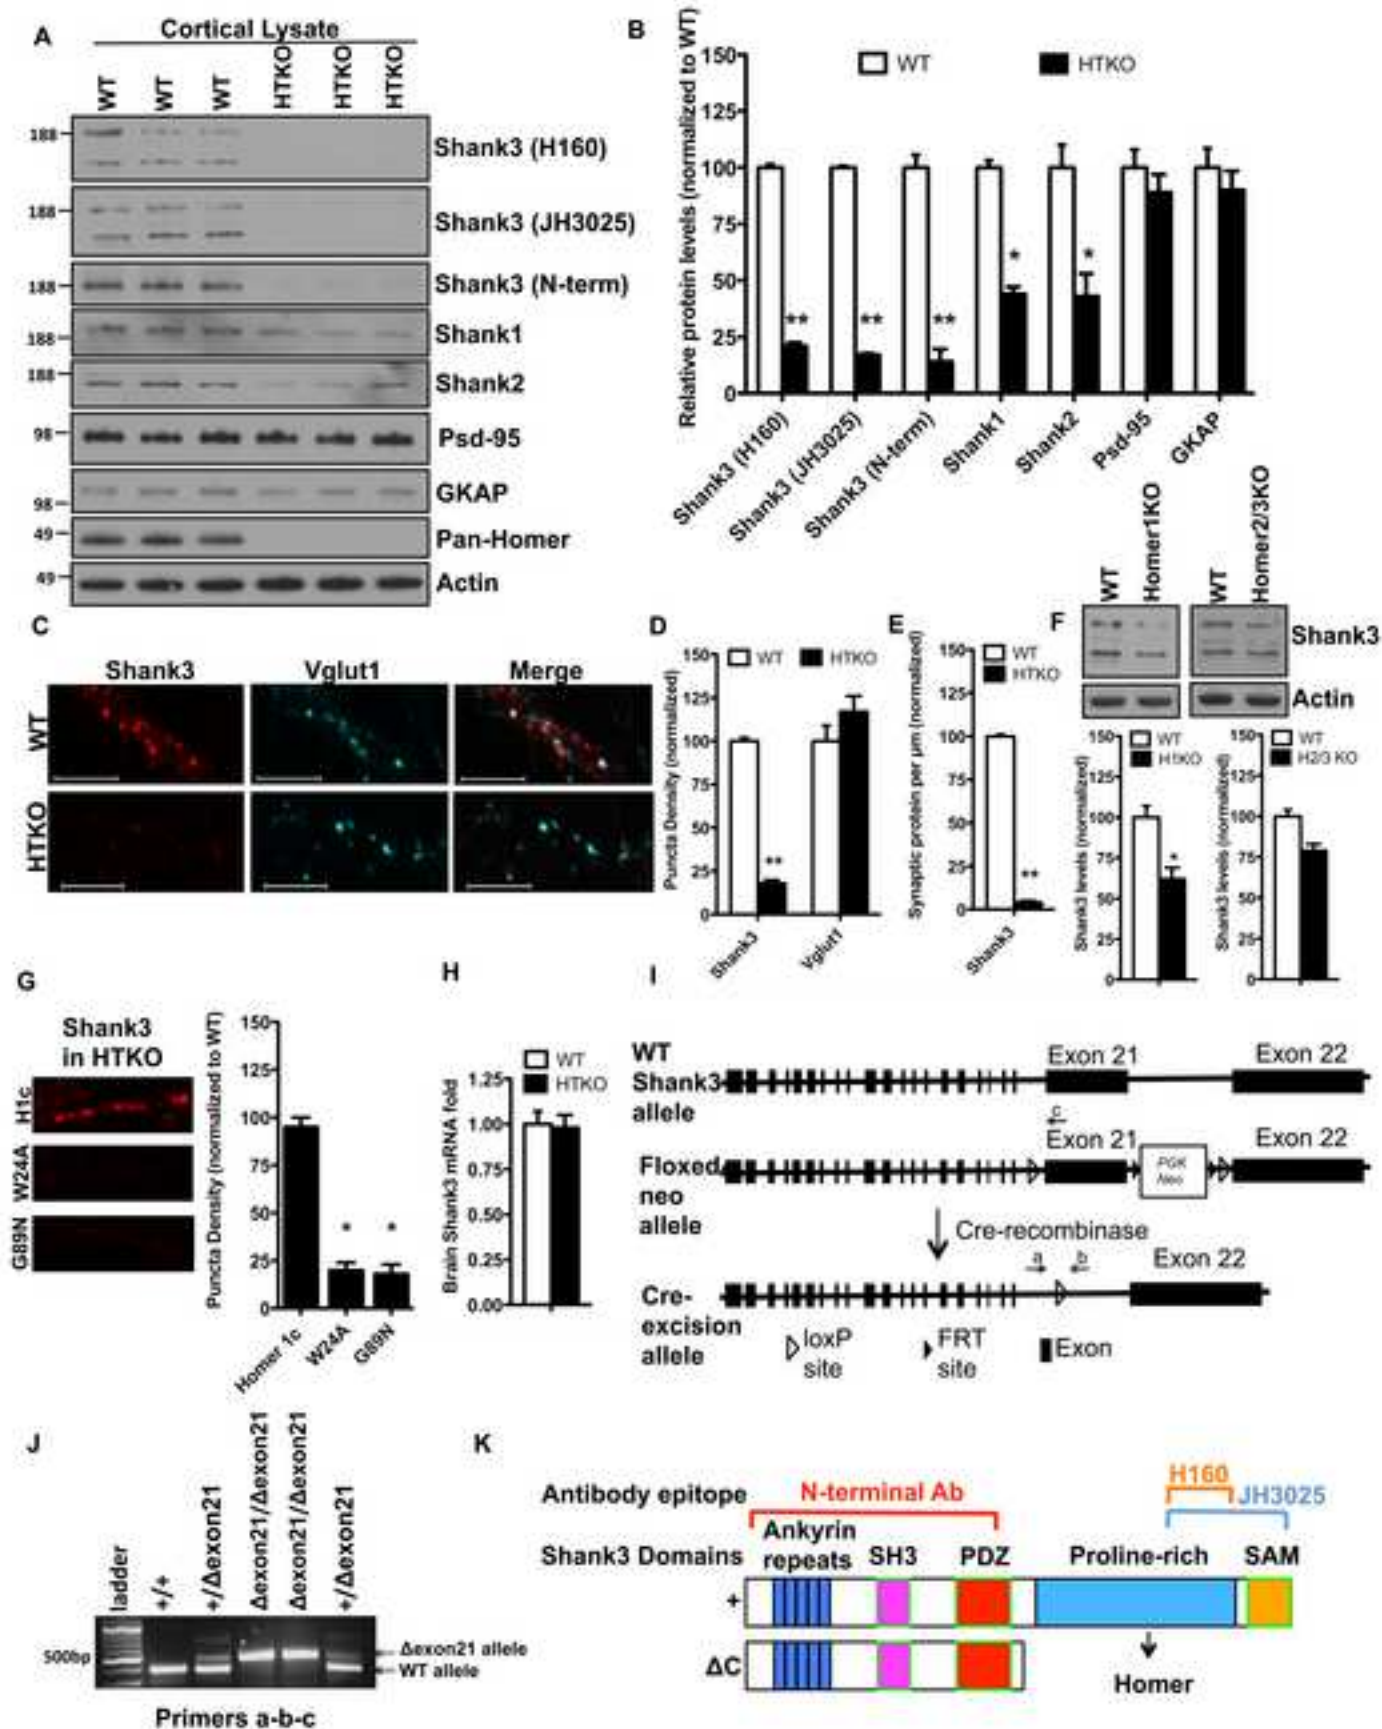

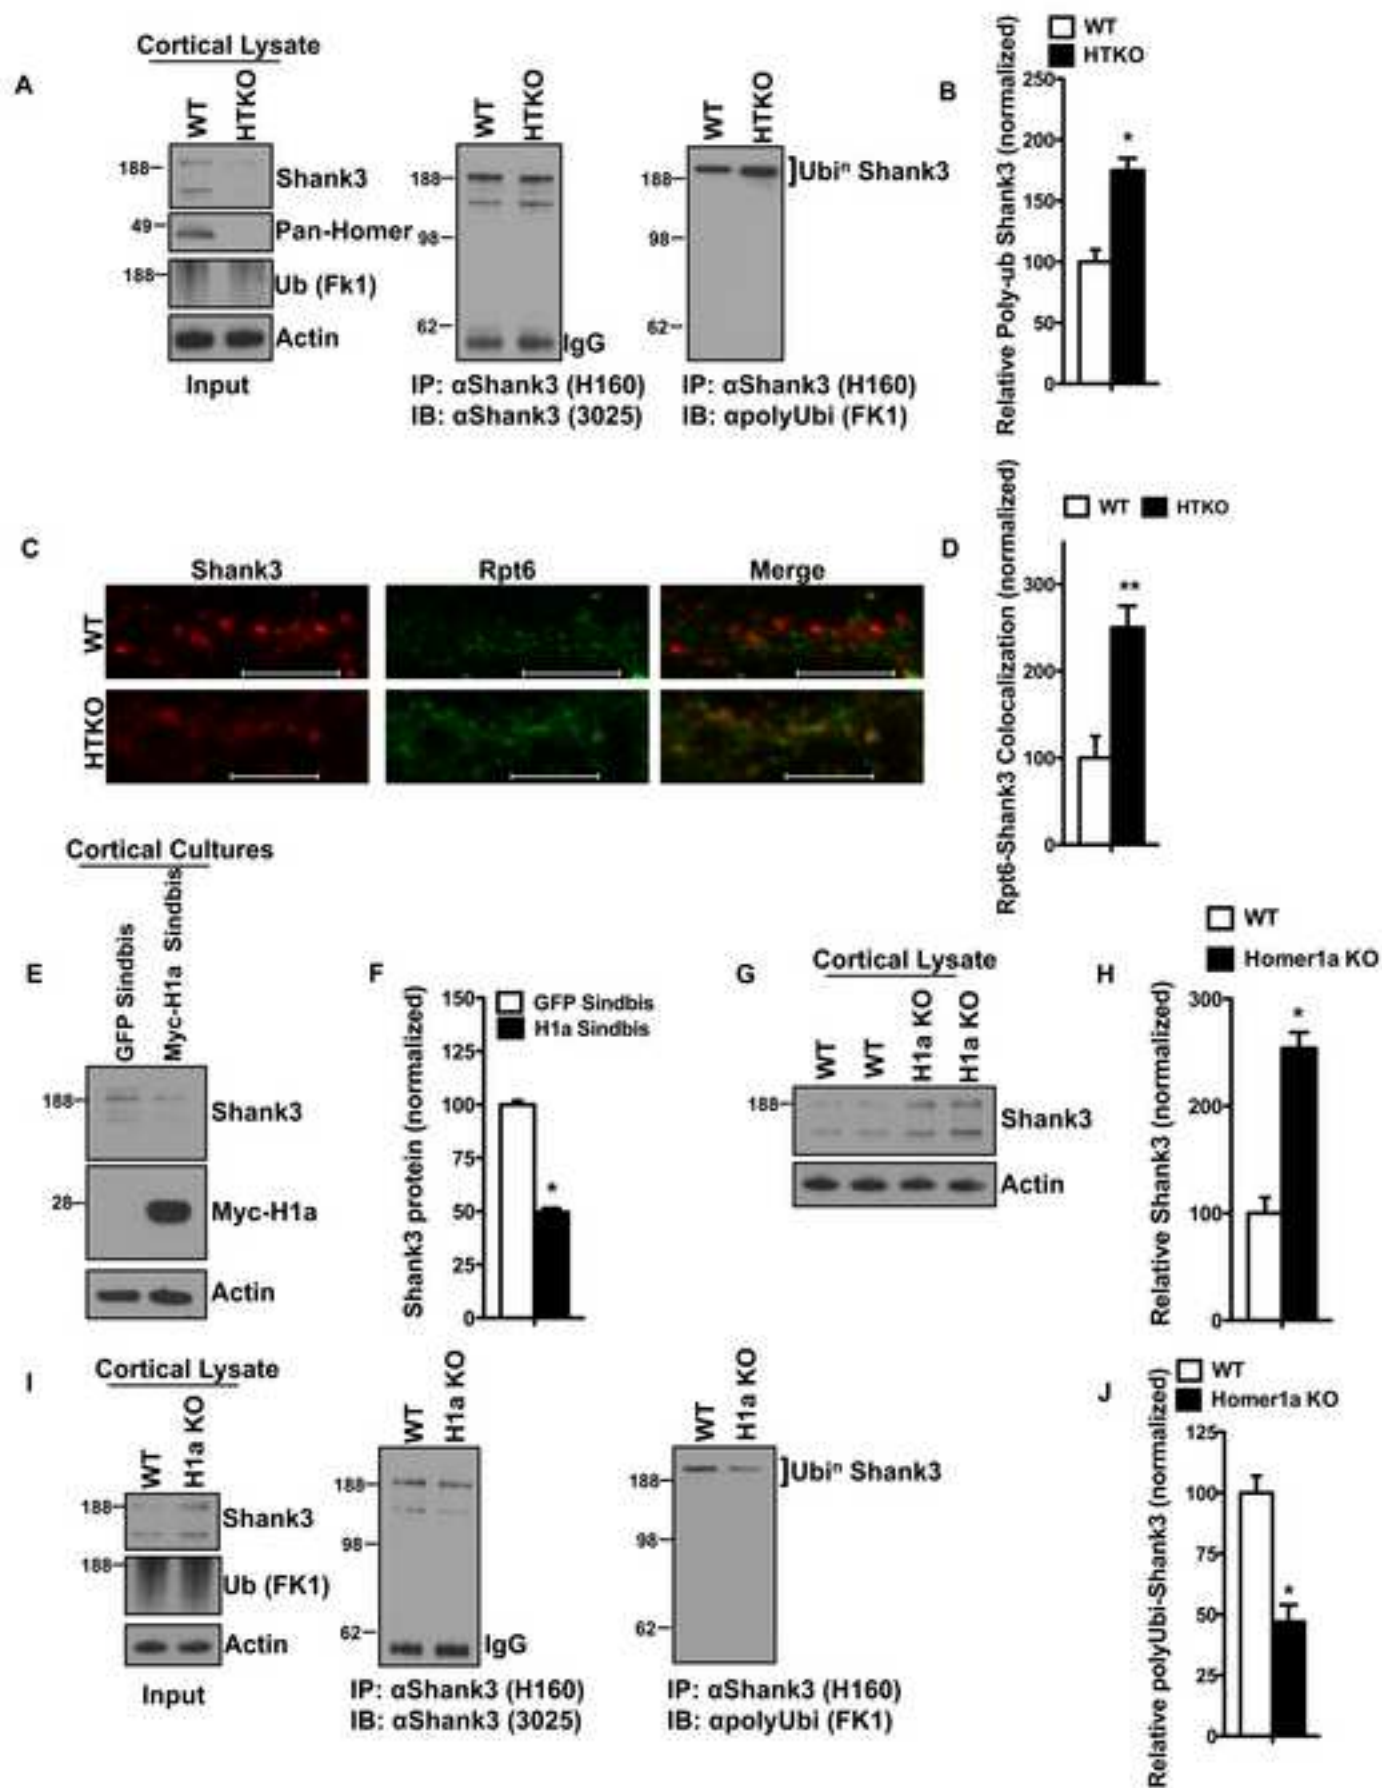

A

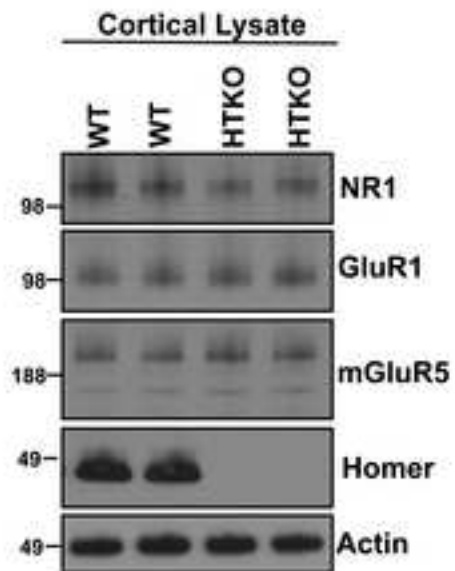

B

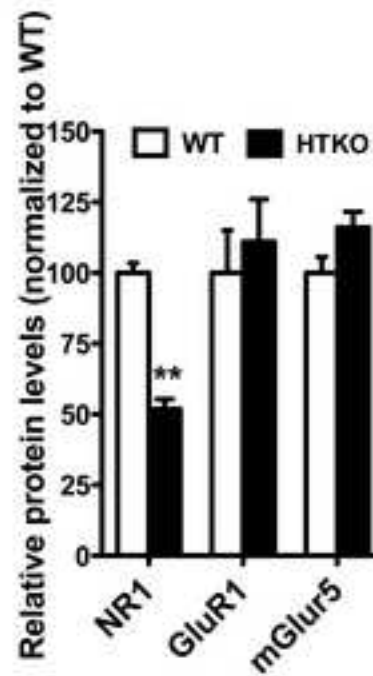

C

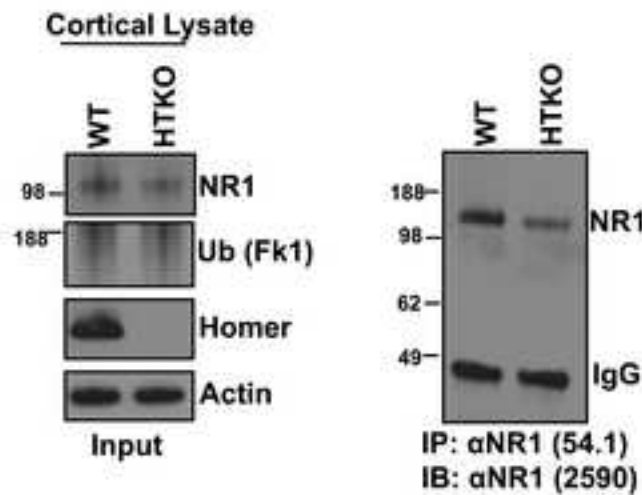

D

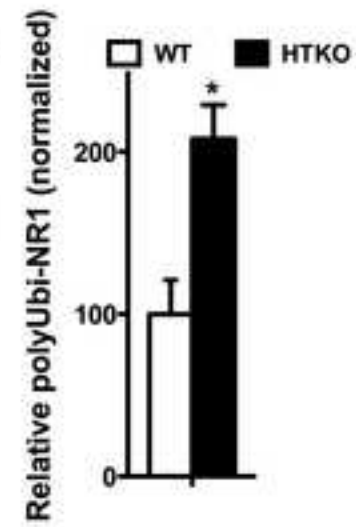

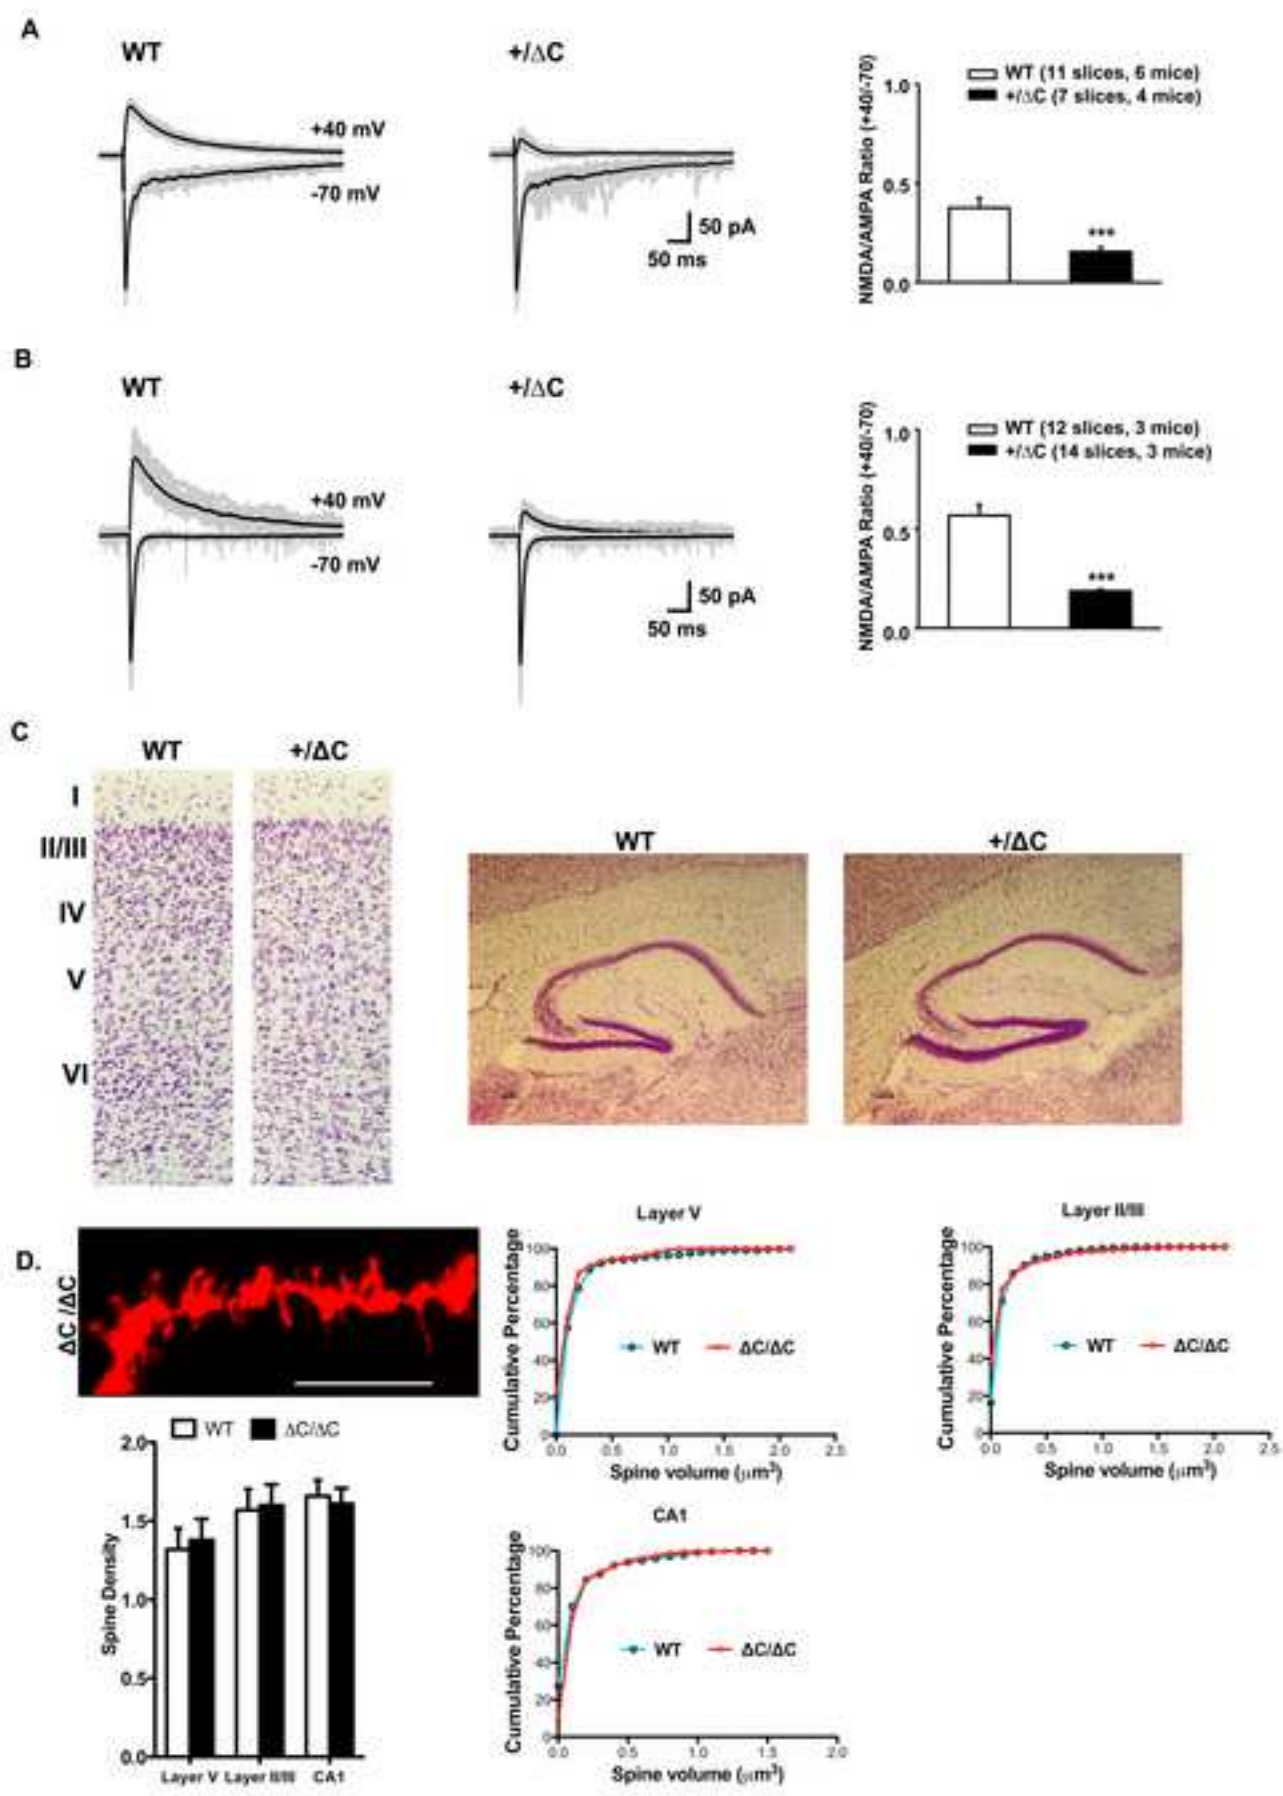

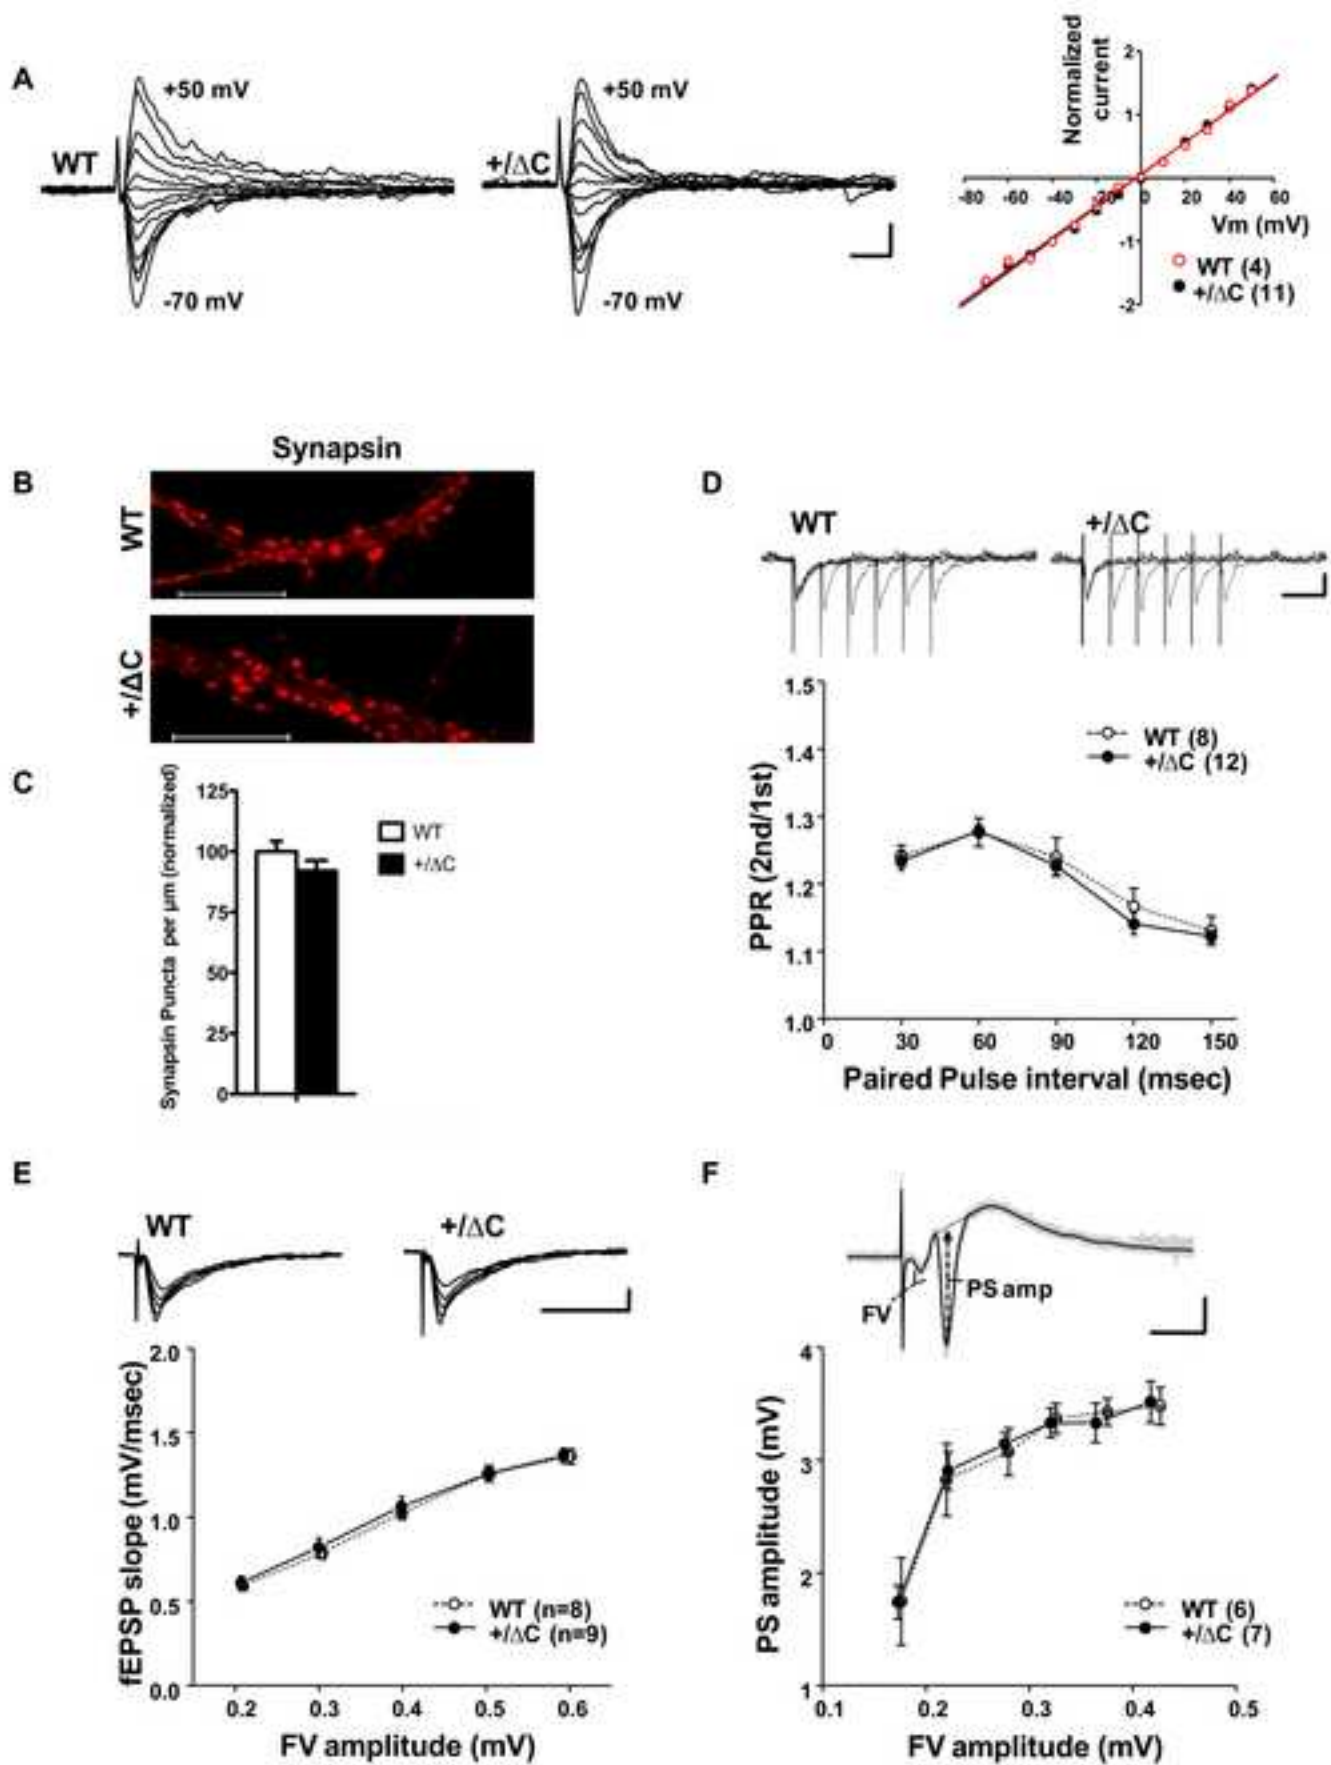

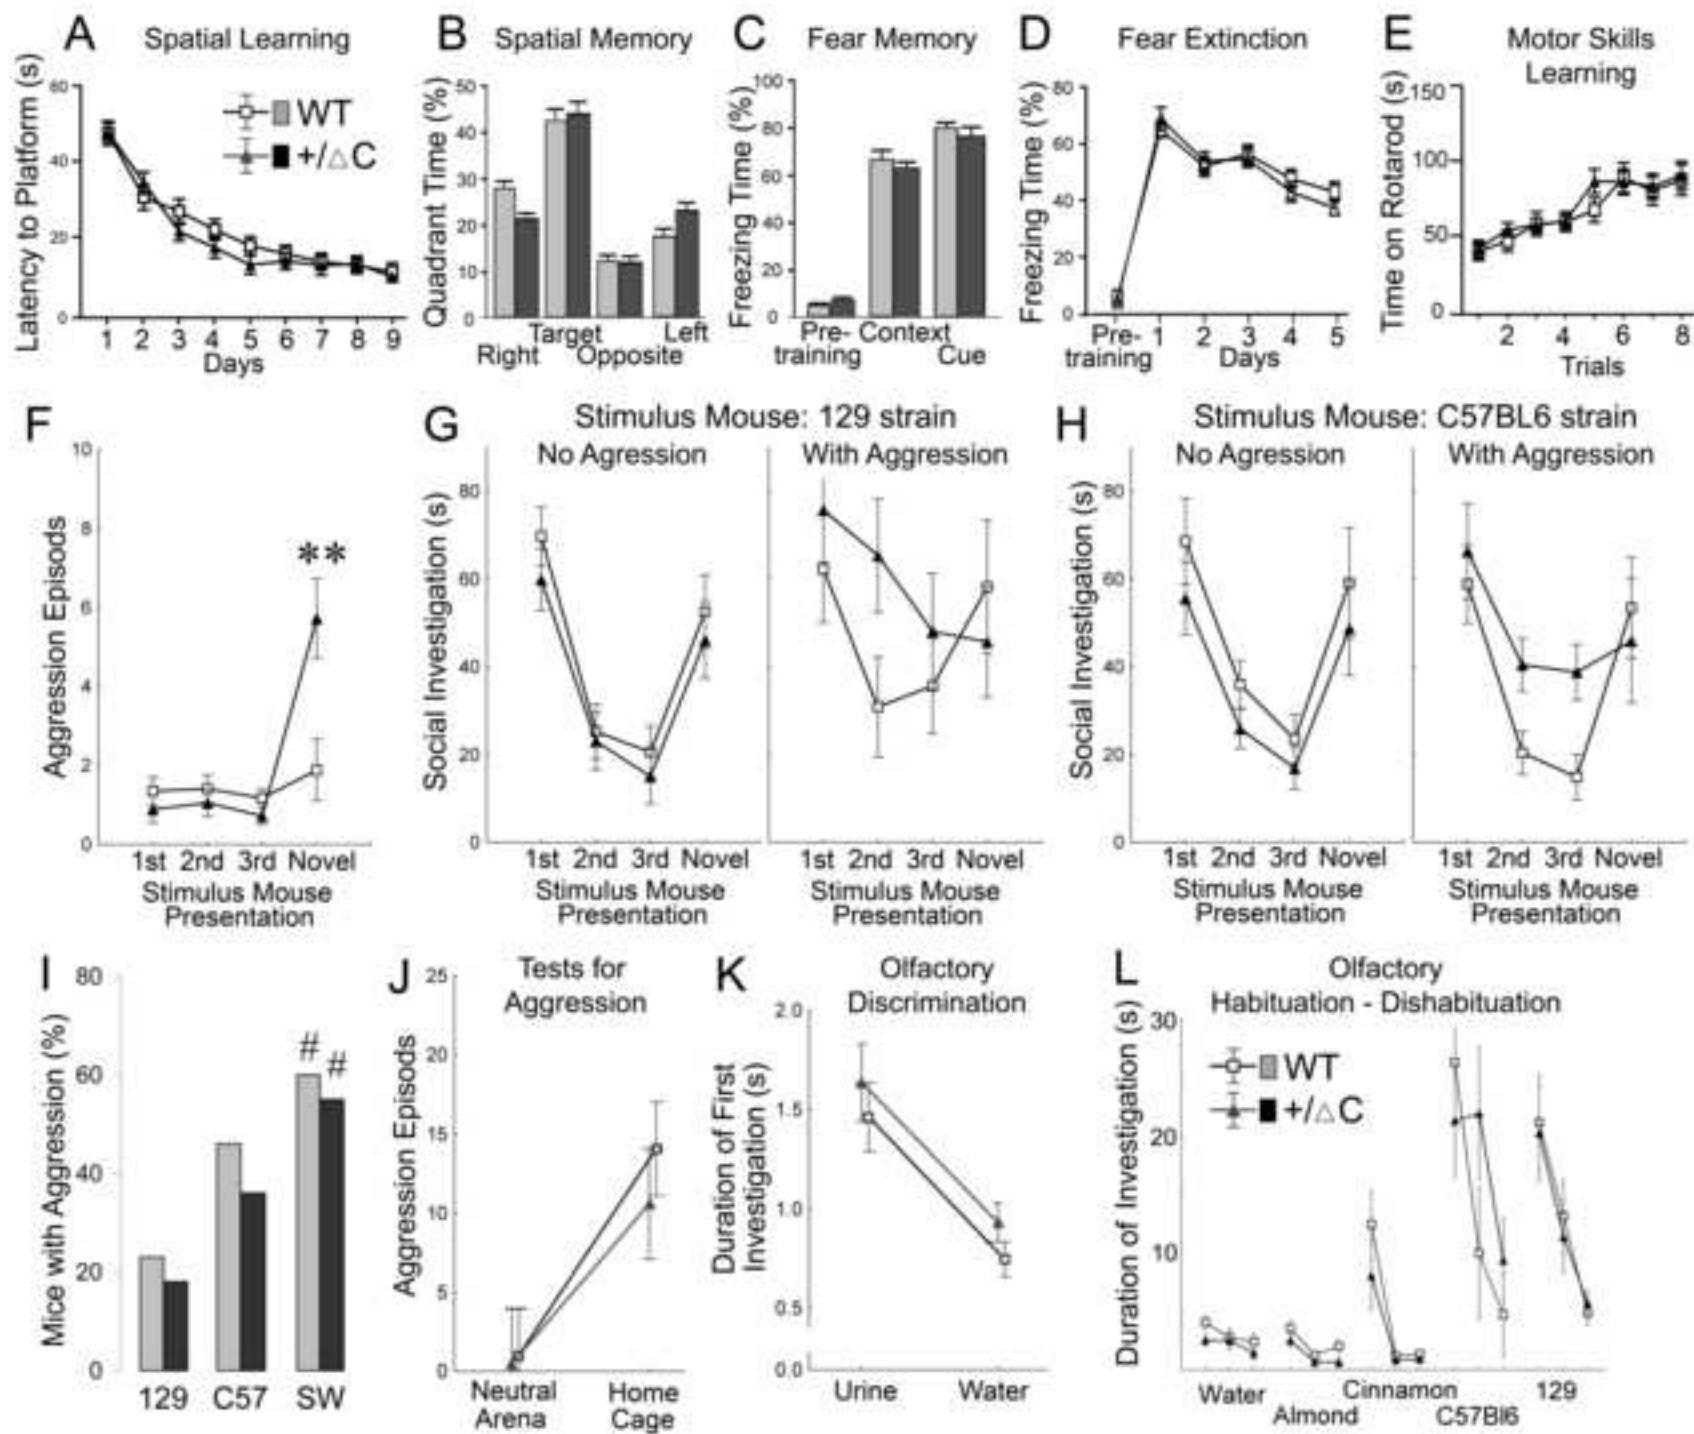

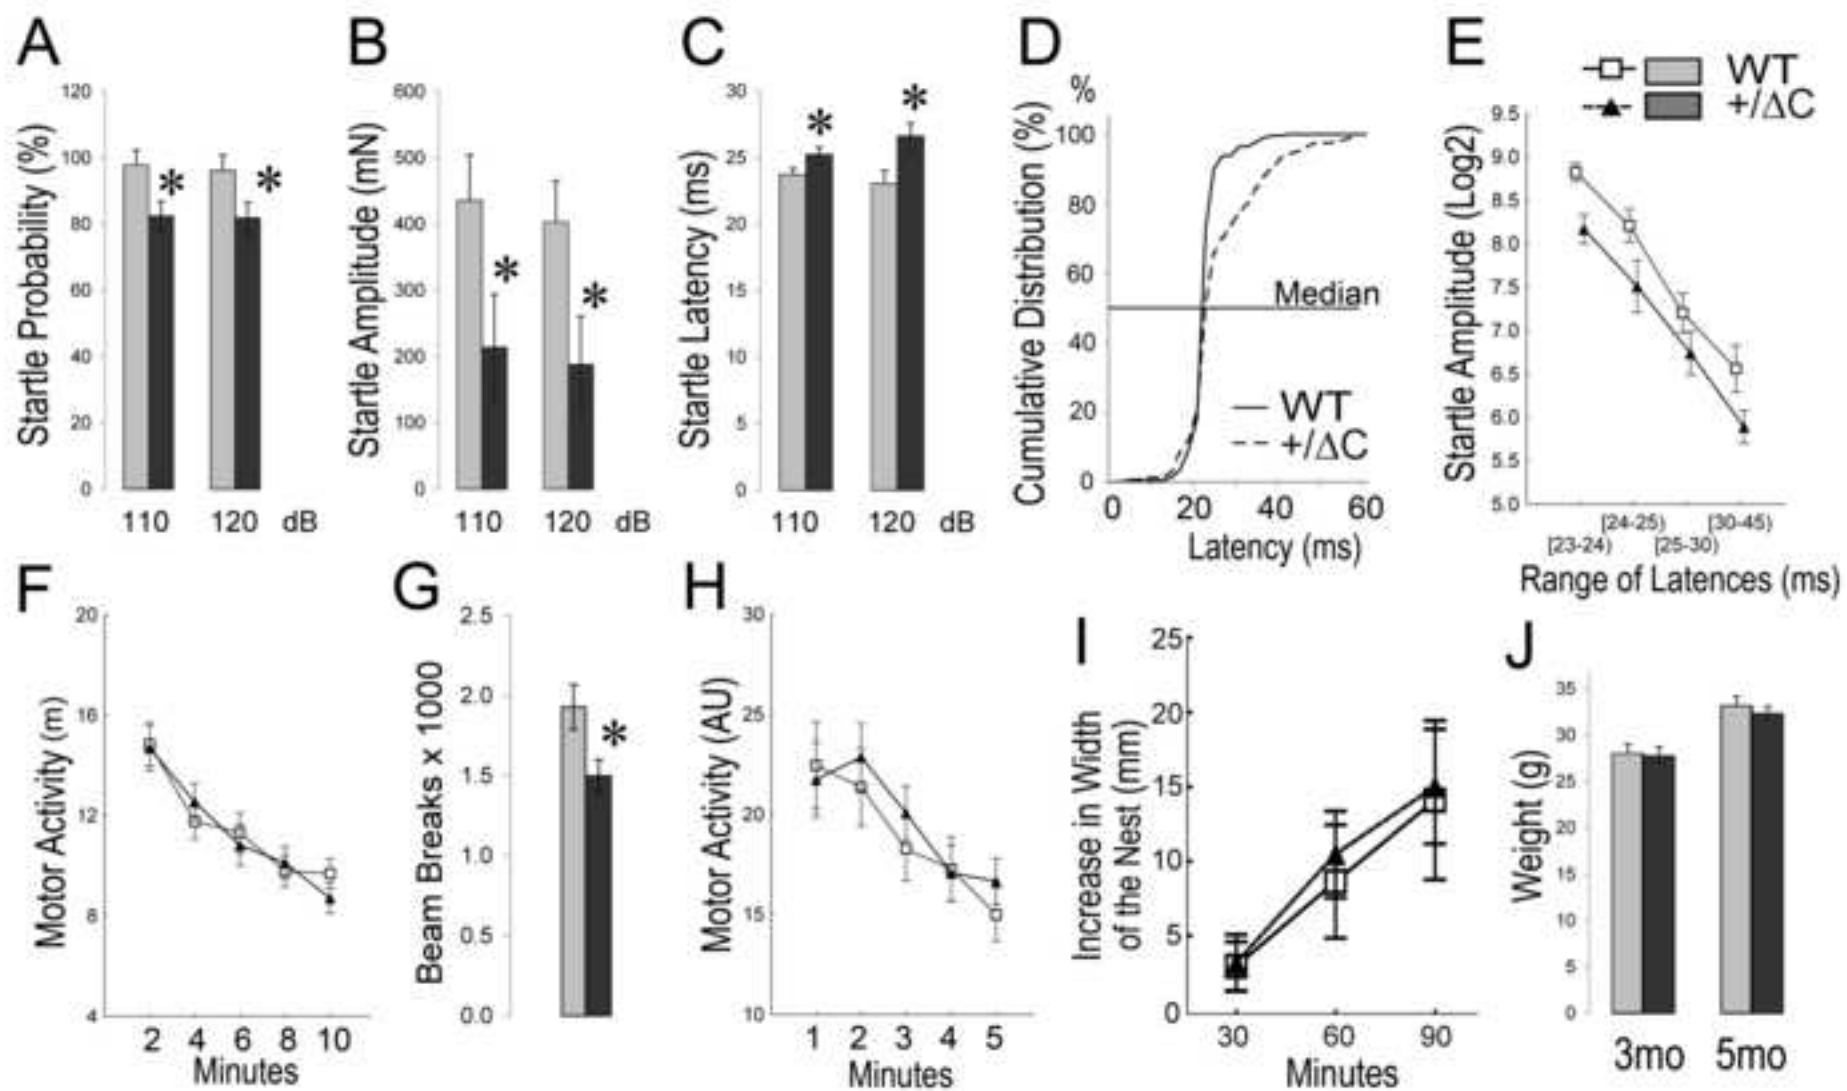



Shank3 is a neuronal protein that functions at excitatory synapses in developing and adult brain. Mutations of Shank3 are linked to autism spectrum disorders. Here we create a transgenic mouse that mimics human mutations of Shank3, and reveal how mutant Shank3 protein causes degradation of synaptic NMDA type glutamate receptors to alter synaptic functions important for information processing. Shank3 mutant mice show autism-like behavioral deficits together with schizophrenia-like phenotypes that are consistent with glutamate receptor changes. The study defines a biochemical pathway leading to NMDA glutamate receptor degradation, and suggests this may be shared in other autism and schizophrenia disorders.

# Cell Conflict of Interest Form

Cell Press, 600 Technology Square, 5th floor, Cambridge, MA 02139

**Please complete this form electronically and upload the file with your final submission.**

Cell requires all authors to disclose any financial interest that might be construed to influence the results or interpretation of their manuscript.

As a guideline, any affiliation associated with a payment or financial benefit exceeding \$10,000 p.a. or 5% ownership of a company or research funding by a company with related interests would constitute a financial interest that must be declared. This policy applies to all submitted research manuscripts and review material.

Examples of statement language include: AUTHOR is an employee and shareholder of COMPANY; AUTHOR is a founder of COMPANY and a member of its scientific advisory board. This work was supported in part by a grant from COMPANY.

Please disclose any such interest below on behalf of all authors of this manuscript.

---

## Please check one of the following:

- None of the authors of this manuscript have a financial interest related to this work.
- Please print the following Disclosure Statement in the Acknowledgments section:

## Please provide the following information:

- Please check this box to indicate that you have asked every author of this work to declare any conflicts of interest. Your answers on this form are on behalf of every author of this work.

Manuscript #: CELL-D-10-01604R1

Article Title: Enhanced Polyubiquitination of Shank3 and NMDA receptor in a mouse model of Autism.

Author List: M Ali Bangash; Joo Min Park; Tatiana Melnikova; Dehua Wang; Soo Kyeong Jeon;

Deidre Lee; Sbaa Syeda; Juno Kim; Mehreen Kouser; Joshua Schwartz; Yiyuan Cui; Xia Zhao; Haley

Speed; Sara Kee; Jian Cheng Tu; Jia-Hua Hu; Ronald S Petralia; David J Linden; Craig Powell; Alena Savonenko;

Bo Xiao; Paul F. Worley

Your Name: Paul F. Worley

Date: 03/15/2011
