# Supplementary material
Source: PubMed Central journal article supplement (PMC3110672)

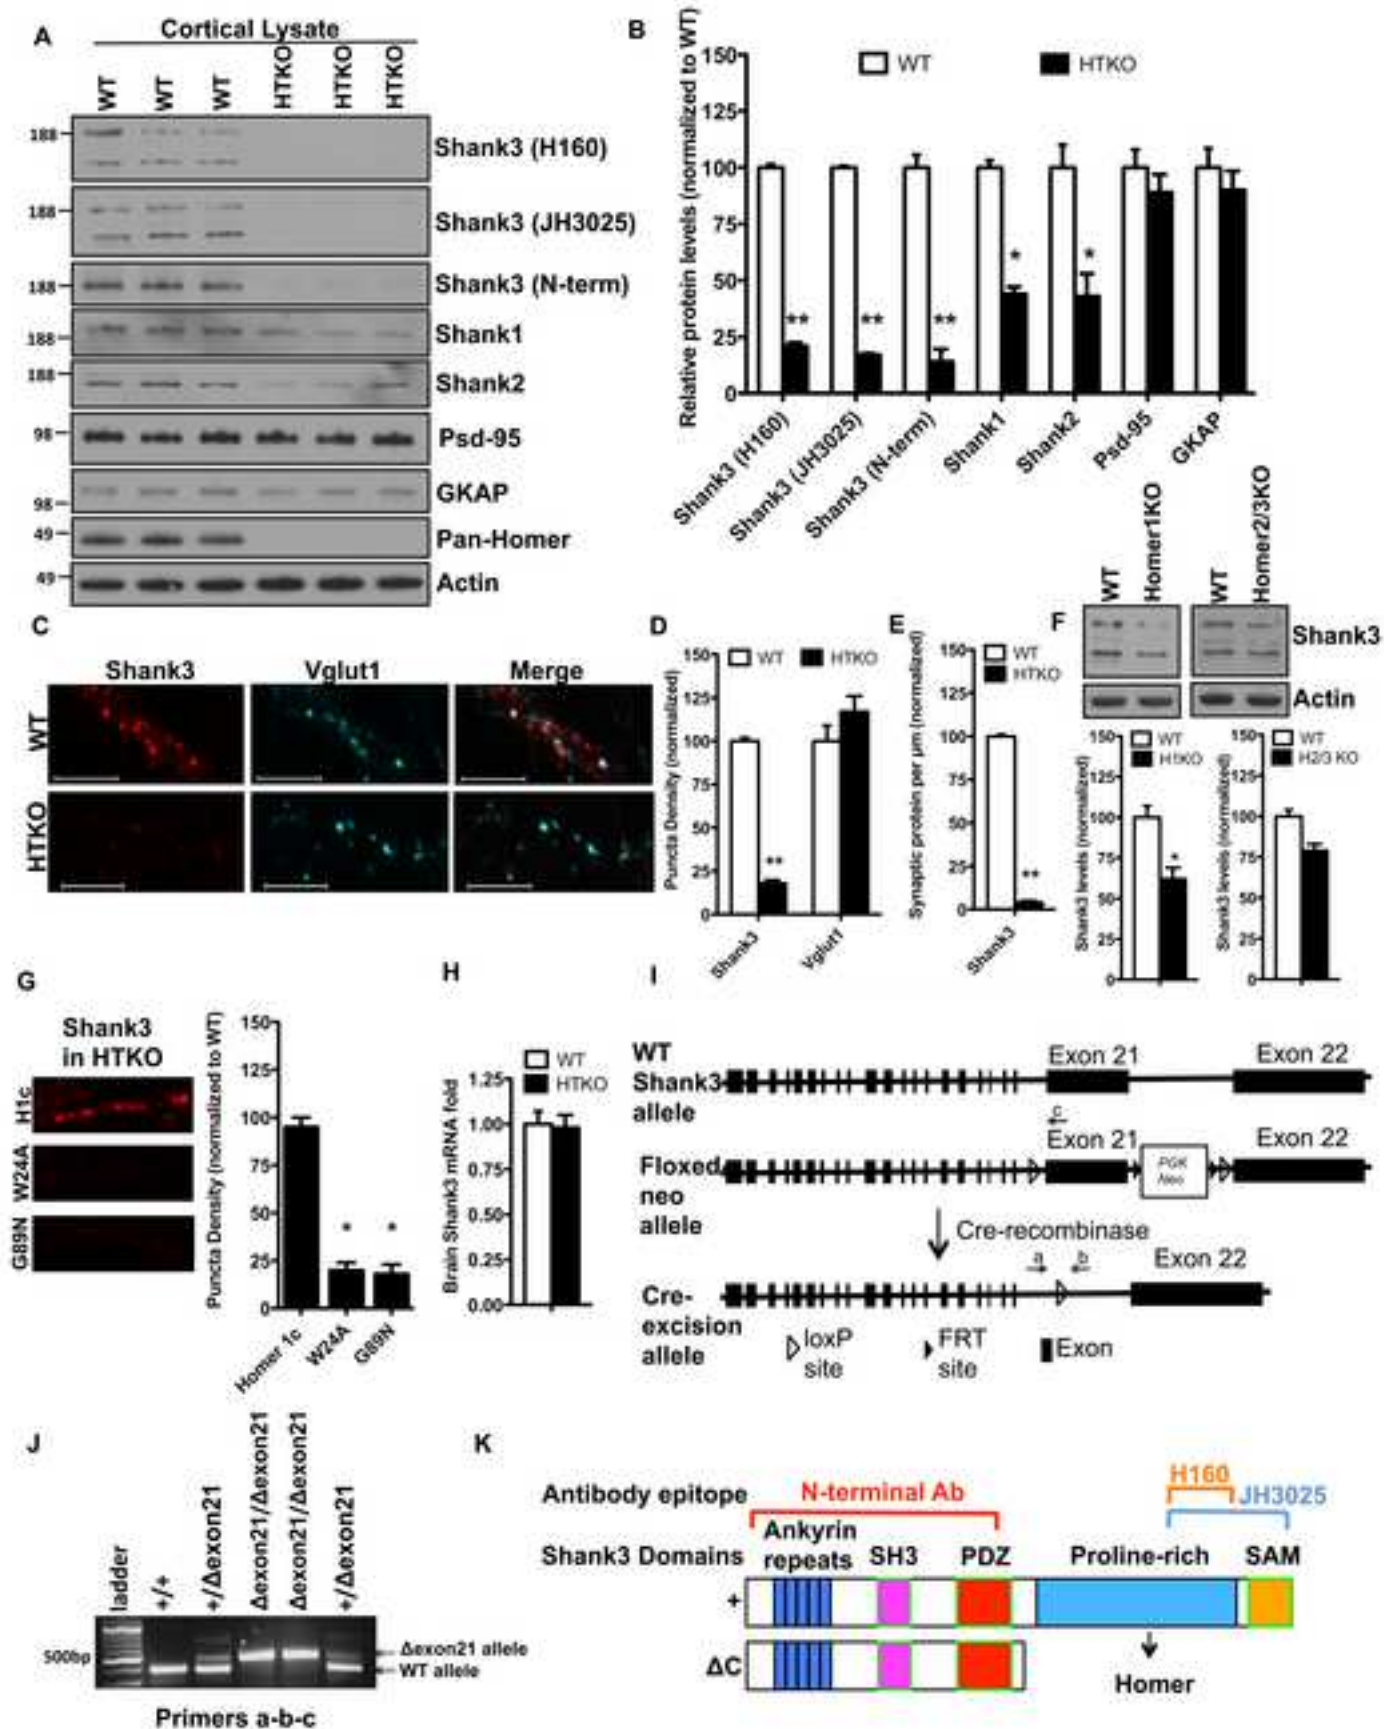

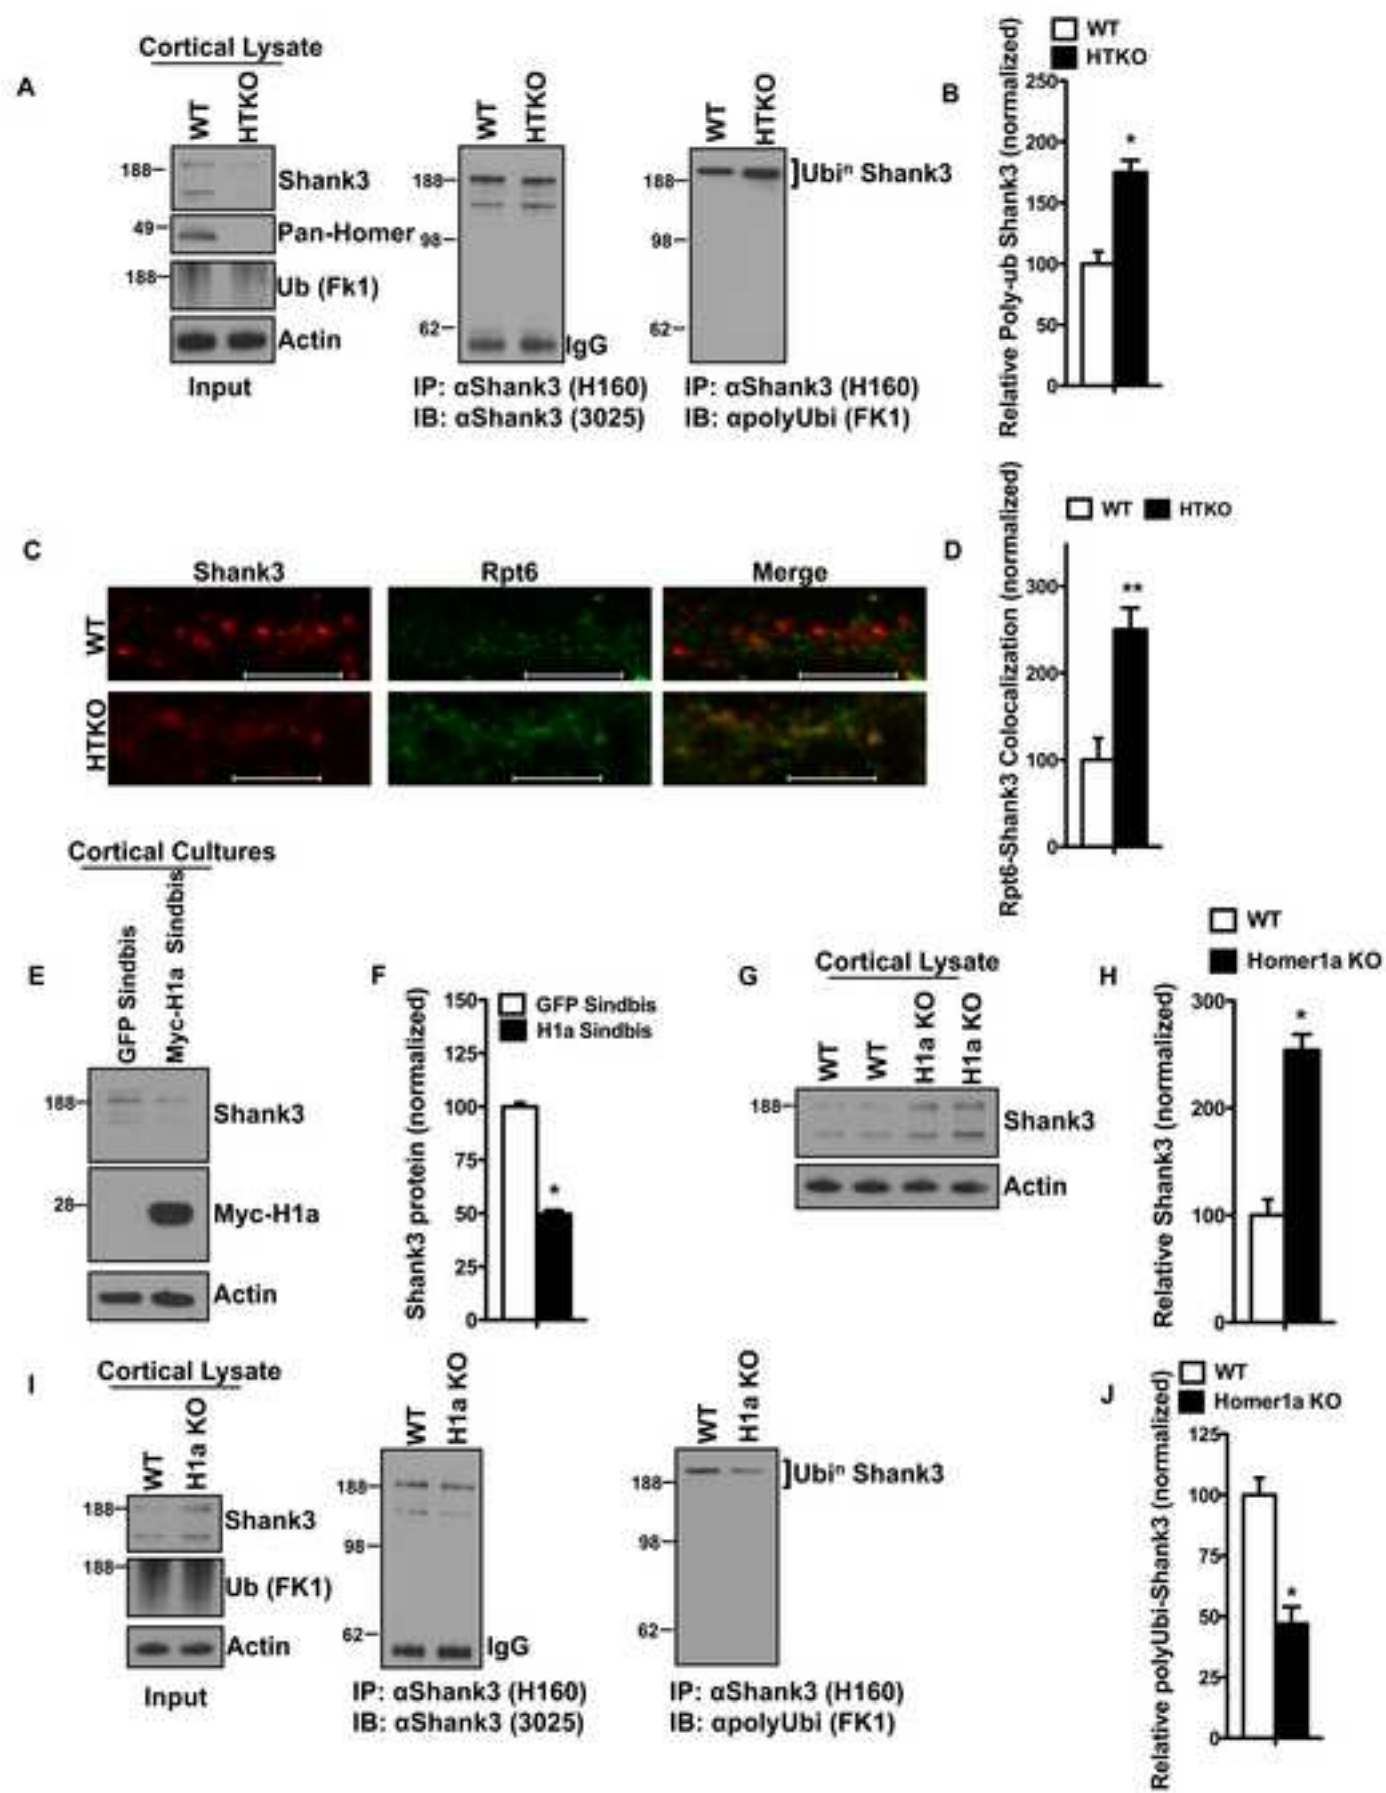

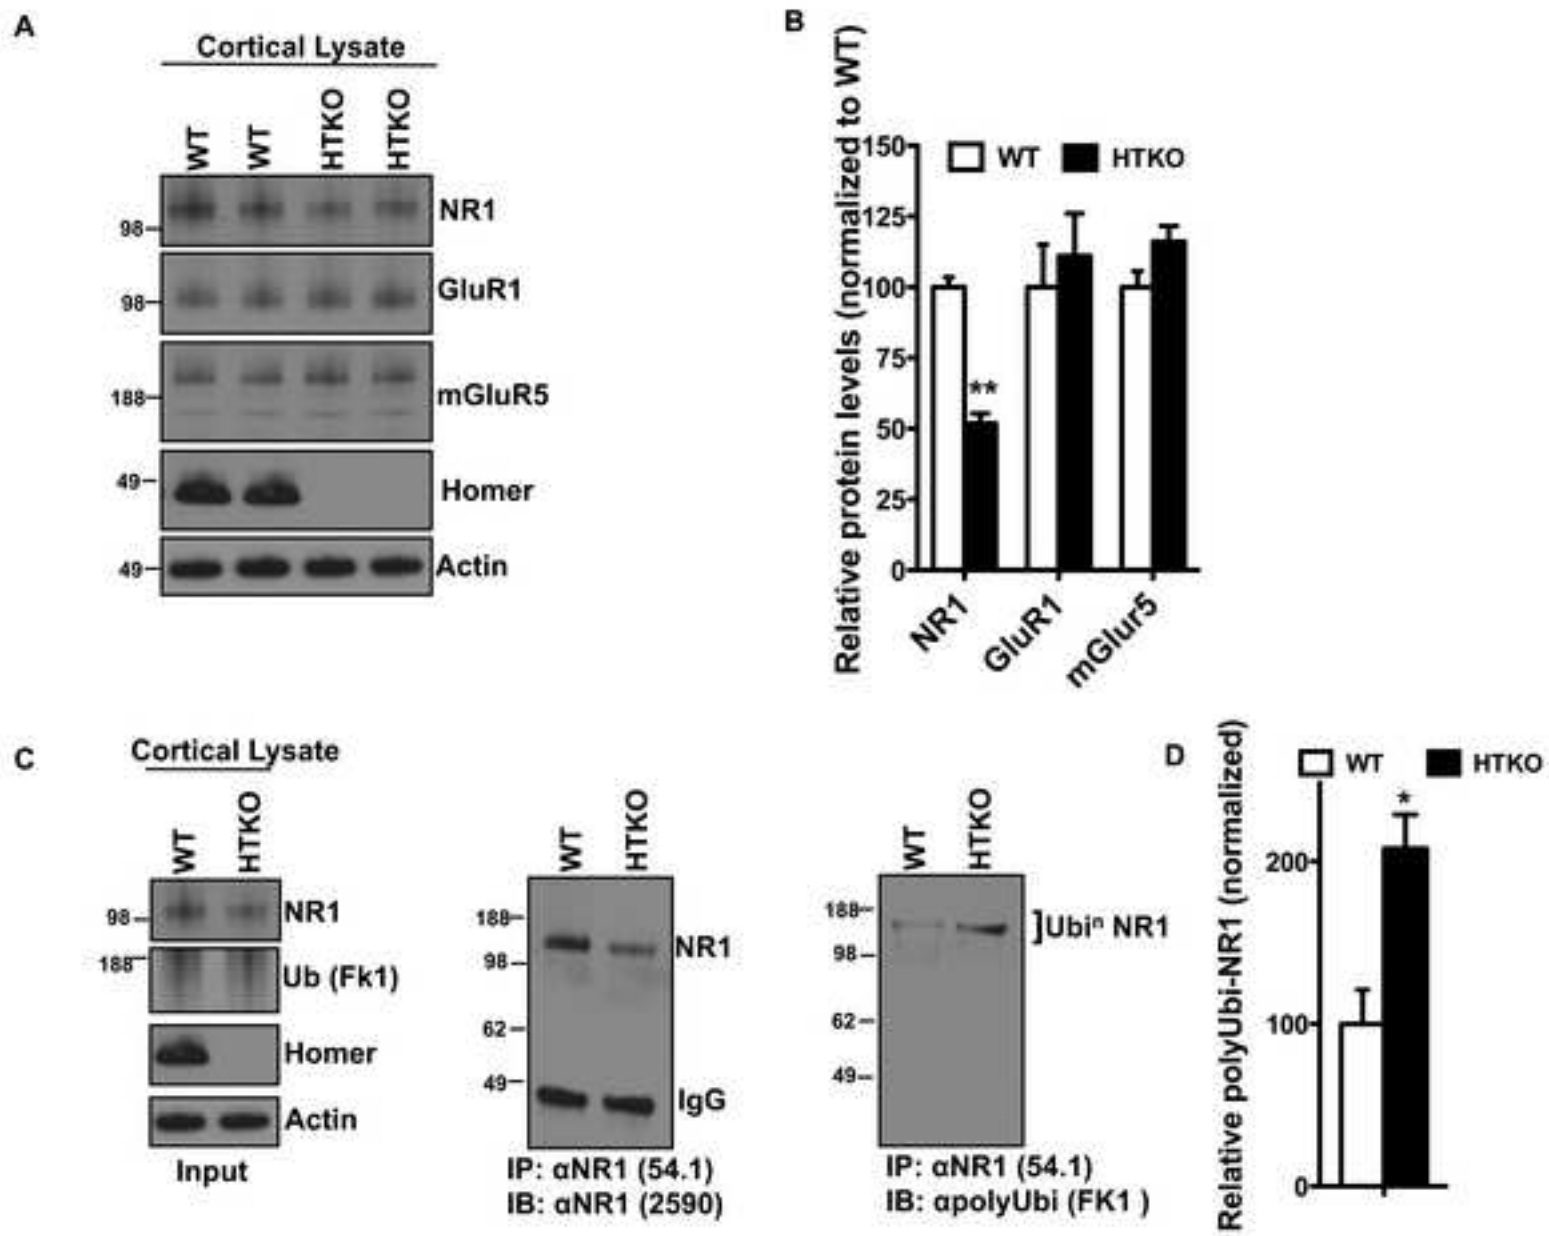

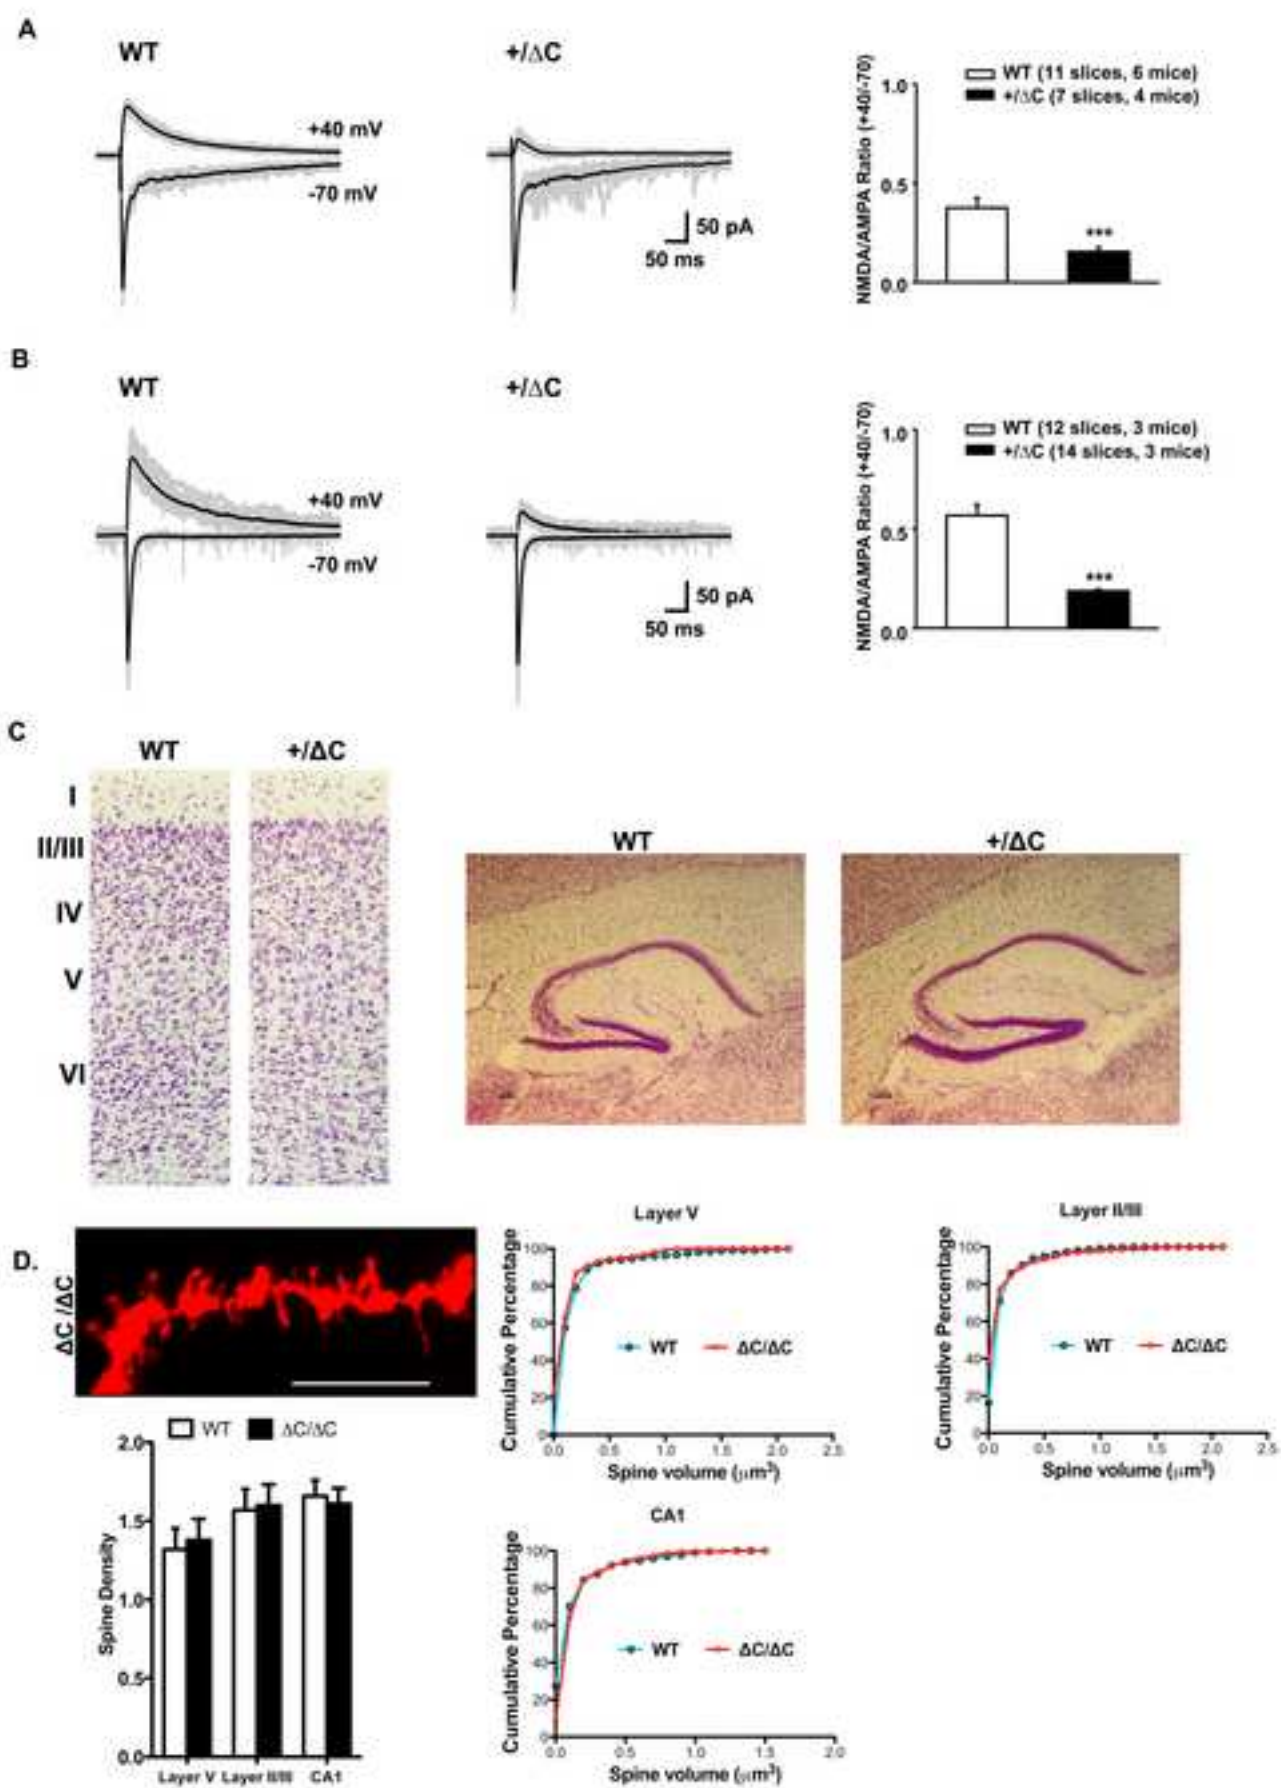

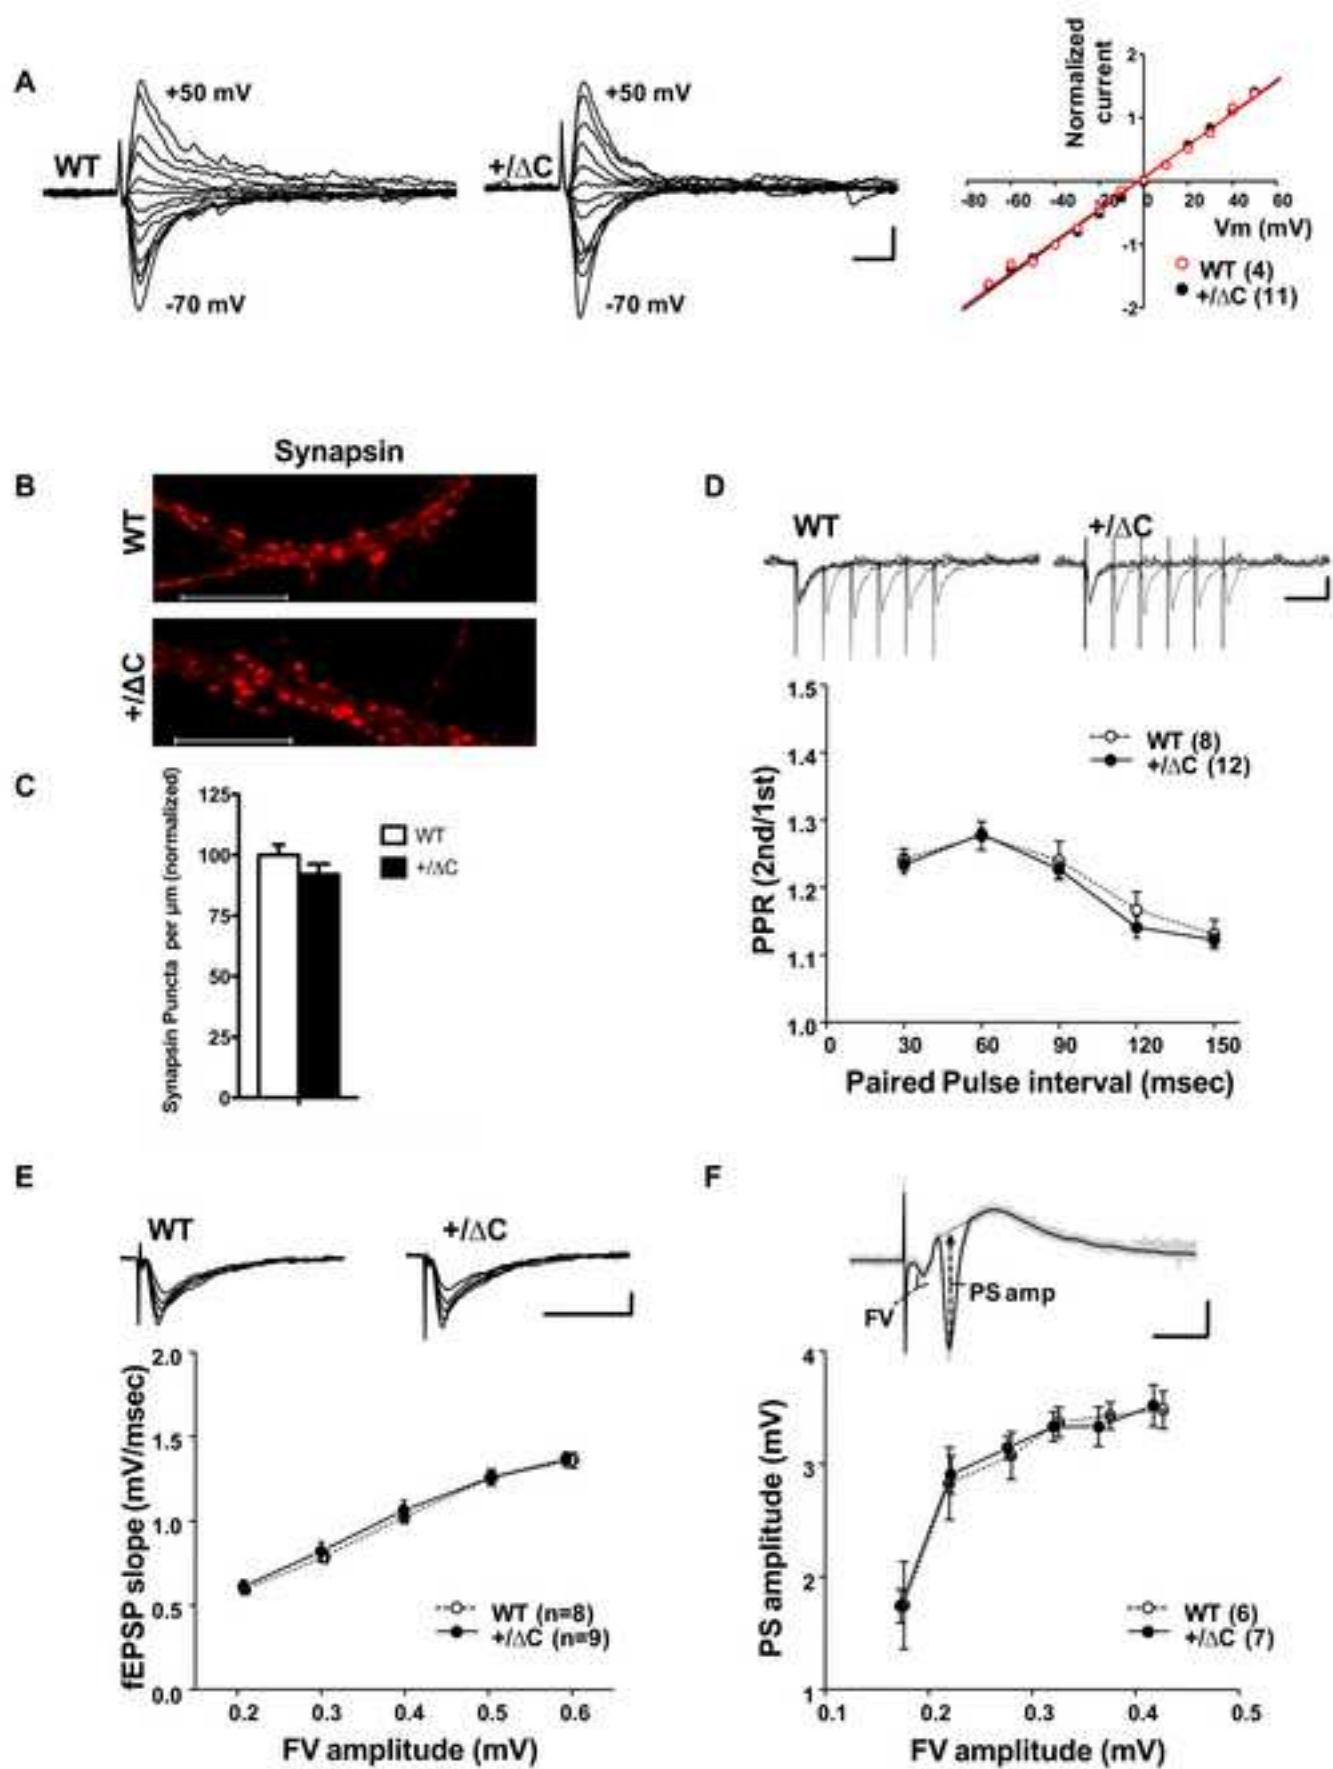



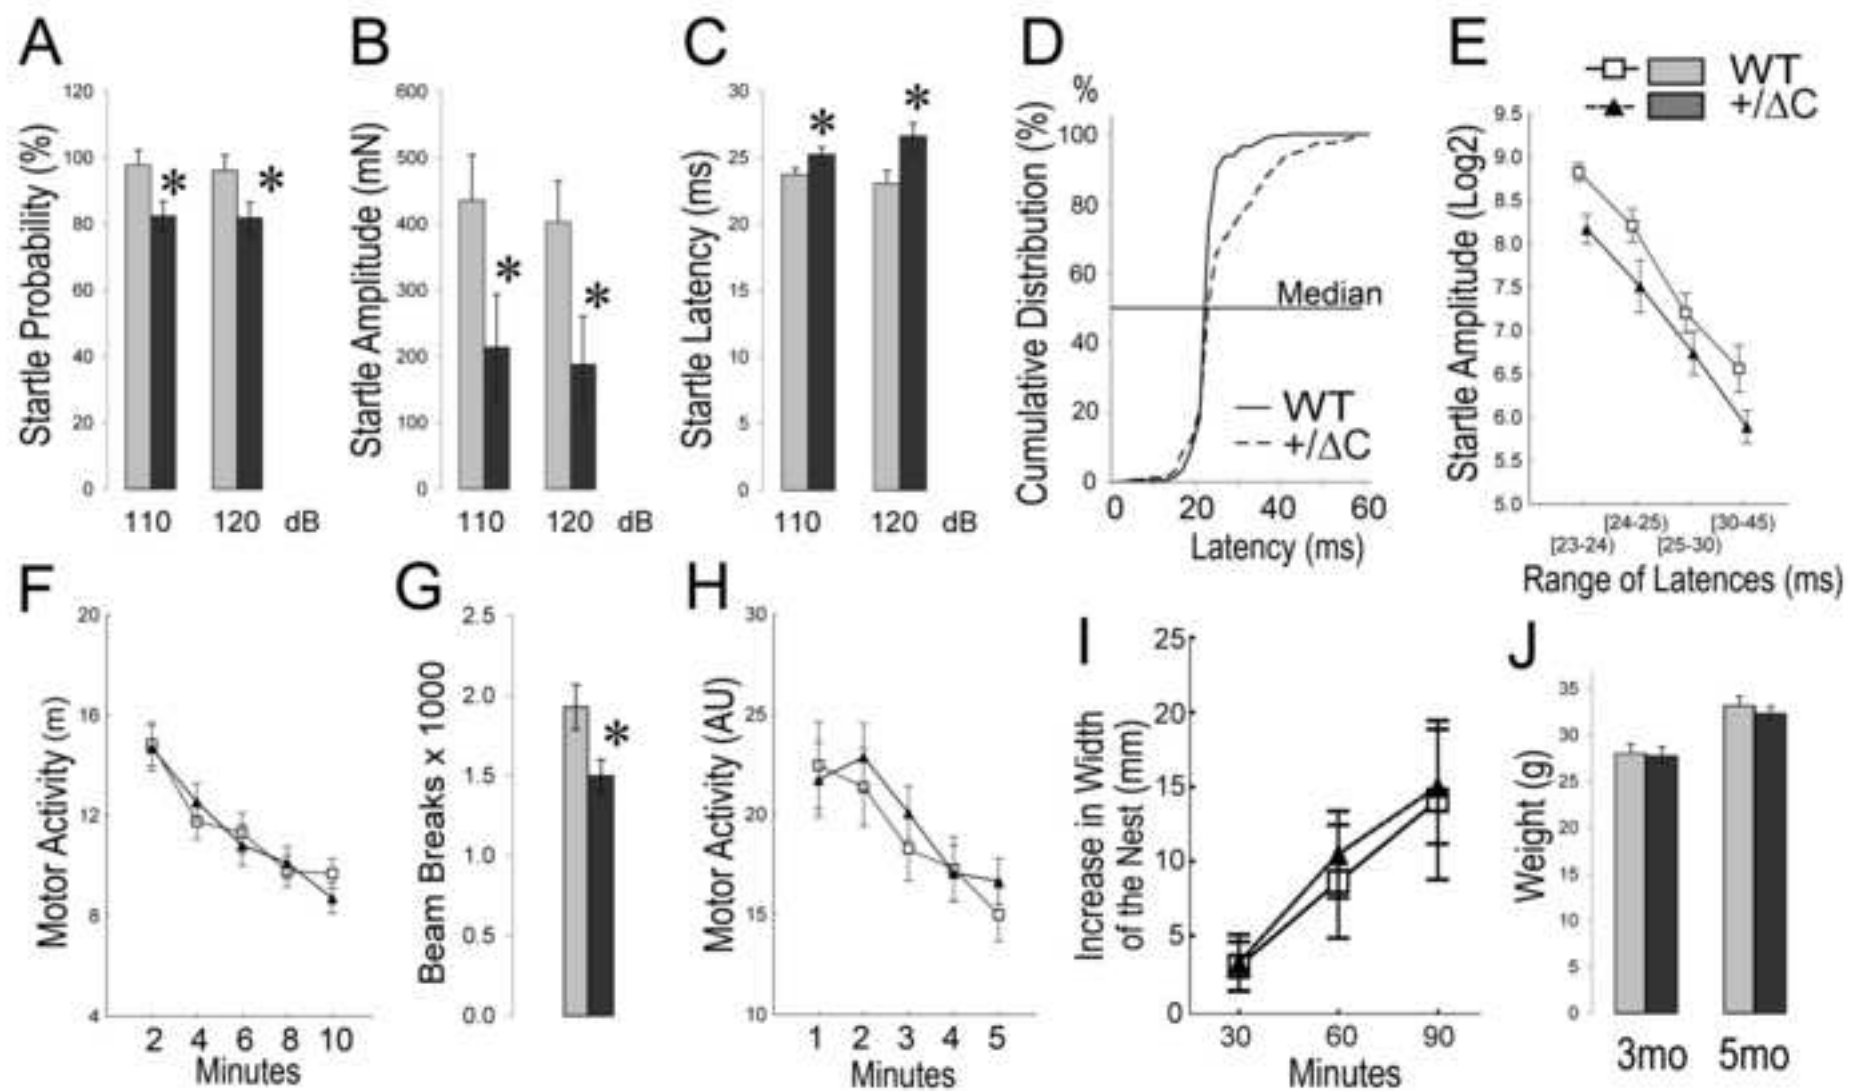

Supplement: NIHMS296226-supplement-03.pdf [file NIHMS296226-supplement-03.pdf]
